# Supplementary material for: Selection of housekeeping genes as internal controls for quantitative RT-PCR analysis of the veined rapa whelk ( Rapana venosa )
Source: PeerJ journal article supplement (doi:10.7717/peerj.3398), 2017-05-31
Supplement: Figure_S2._The_number_of_reference_genes_required_for_accurate_normalization_of_eight_different_tissues_based_on_pairwise_variation_between_candidate_genes_by_GeNorm..pdf [file Figure_S2._The_number_of_reference_genes_required_for_accurate_normalization_of_eight_different_tissues_based_on_pairwise_variation_between_candidate_genes_by_GeNorm..pdf]

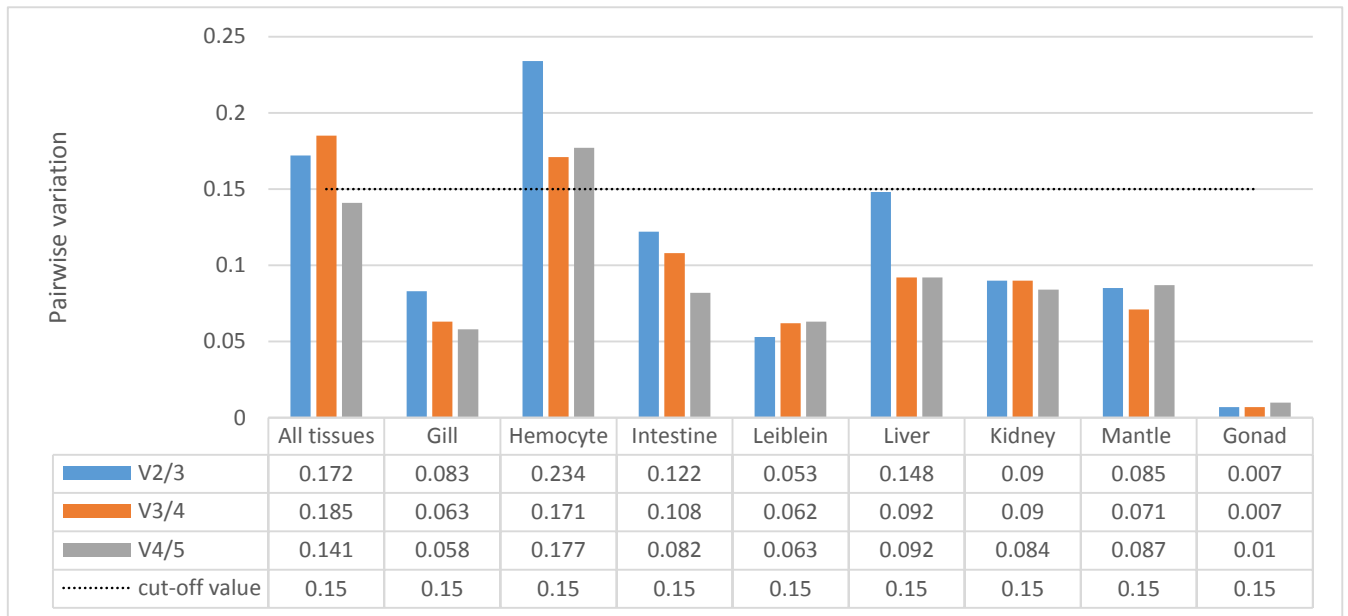

**Figure S2. The number of reference genes required for accurate normalization of eight different tissues based on pairwise variation between candidate genes by GeNorm.**
