# Supplementary material for: Selection of housekeeping genes as internal controls for quantitative RT-PCR analysis of the veined rapa whelk ( Rapana venosa )
Source: PeerJ journal article supplement (doi:10.7717/peerj.3398), 2017-05-31
Supplement: Figure_S3._The_number_of_reference_genes_required_for_accurate_normalization_of_five_developmental_stages_based_on_pairwise_variation_between_candidate_genes_by_GeNorm..pdf [file Figure_S3._The_number_of_reference_genes_required_for_accurate_normalization_of_five_developmental_stages_based_on_pairwise_variation_between_candidate_genes_by_GeNorm..pdf]

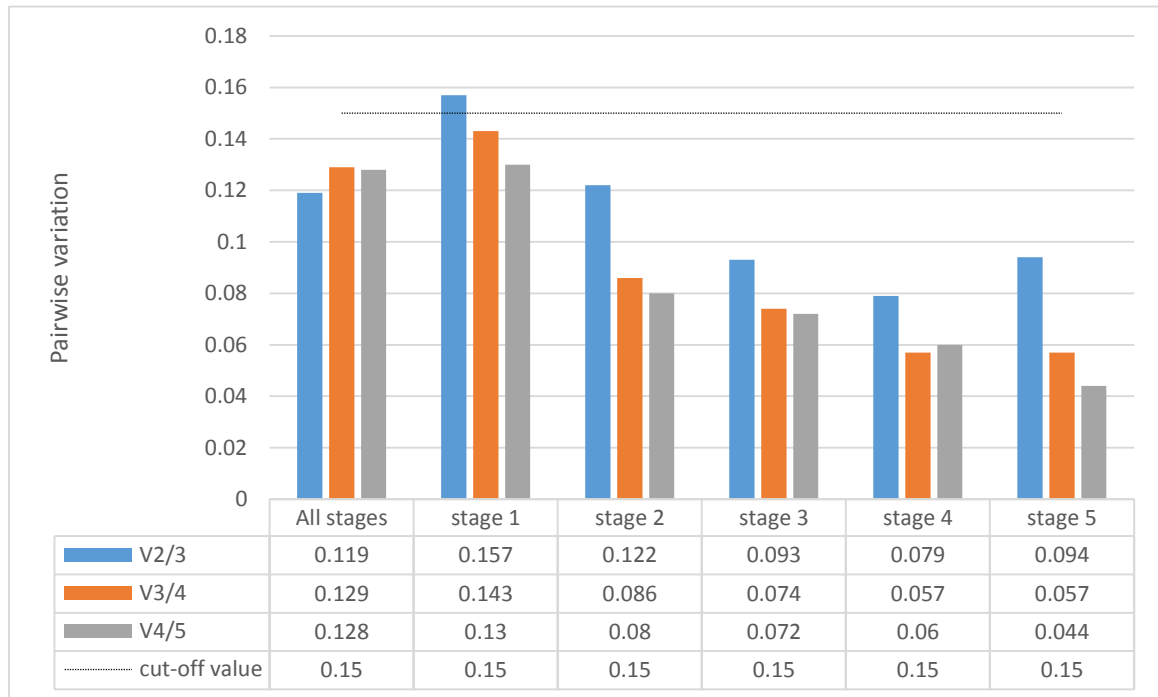

**Figure S3. The number of reference genes required for accurate normalization of five developmental stages based on pairwise variation between candidate genes by GeNorm.**
