# Supplementary material for: Selection of housekeeping genes as internal controls for quantitative RT-PCR analysis of the veined rapa whelk ( Rapana venosa )
Source: PeerJ journal article supplement (doi:10.7717/peerj.3398), 2017-05-31

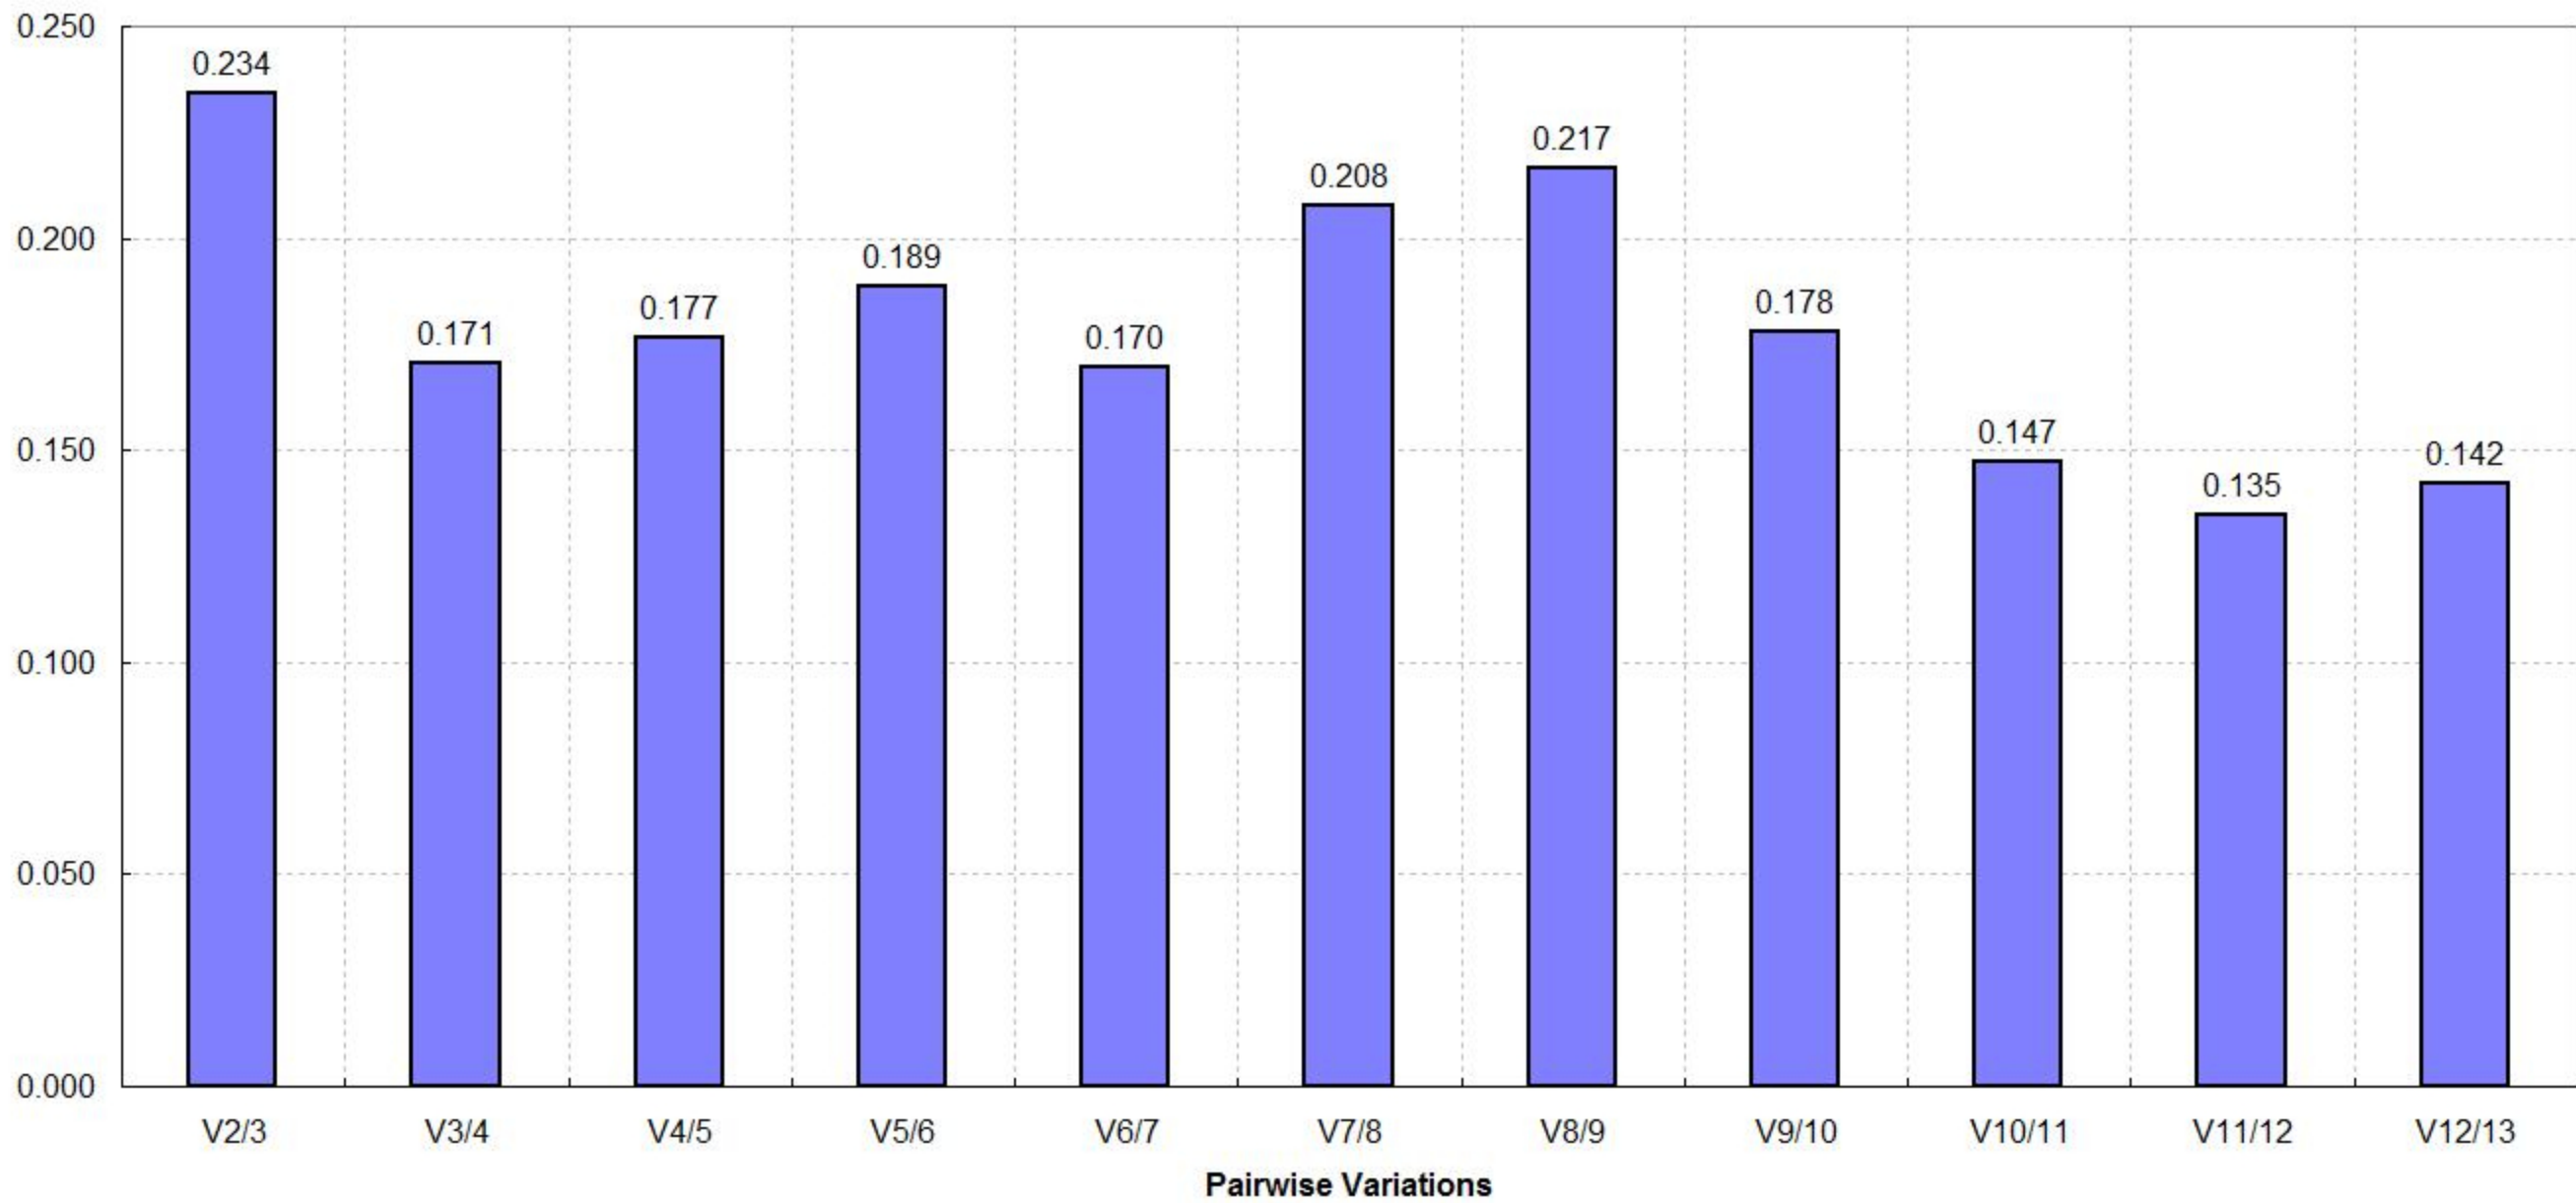

Supplement: Figure_S4._Determination_of_the_optimal_number_of_control_genes_for_normalization_in_hemocyte.pdf [file Figure_S4._Determination_of_the_optimal_number_of_control_genes_for_normalization_in_hemocyte.pdf]
