# Supplementary material for: Selection of housekeeping genes as internal controls for quantitative RT-PCR analysis of the veined rapa whelk (Rapana venosa)
Source: PeerJ. 2017 May 31;5:e3398. doi: 10.7717/peerj.3398 (PMC5455708; doi:10.7717/peerj.3398)
Supplement: Table S1 [file peerj-05-3398-s001.xlsx]

## Sheet: Sheet1
Development stage	Sample	Number	Cq values
			GAPDH	EF-1α	ACT	COX1	NDUFA7	RL5	RL28	TUBB	RS25	RS8	UBE2	PPIA	HH3
Stage 1	Blastula stage (L)	1	28.41	22.54	29.09	23.89	31.12	28.44	27.97	31.62	31.58	31.33	32.85	30.98	28.93
		2	28.67	23.52	29.71	24.39	32.41	28.21	27.94	33.2	31.22	30.19	32.63	30.88	30.1
		3	26.62	20.81	28.23	21.71	28.94	25.92	25.73	30.25	28.85	28.46	30.13	28.85	29.91
		4	29.89	25.67	32.7	25.4	31.83	29.01	28.76	32.09	31.5	31.89	32.82	32.15	30.74
		5	29.84	24.14	32.04	22.53	29.17	26.12	26.69	31.38	31.76	29.86	31.71	30.69	30.35
	Gastrula stage (M)	1	26.79	23.16	30.32	23.4	30.25	26.86	27.18	29.63	29.68	28.92	30.37	28.55	31.66
		2	24.93	21.45	28.57	21.58	28.55	25.95	25.56	27.76	28.55	28.04	29.52	27.97	33.45
		3	27.61	24.18	30.64	24.73	31.36	29.67	28.5	32.99	32.31	31.38	32.16	31.26	31.12
		4	24.82	21.18	27.65	21.49	28.03	24.95	25.94	29.16	28.8	29.63	30.11	27.97	32.6
		5	26.23	22.33	29.24	23.51	29.05	27.31	27.41	30.92	30.83	30.1	32.61	30.68	31.89
	Trochophore larvae (N)	1	25.1	21.76	27.58	21.98	27.81	25.45	25.19	26.22	28.36	27.2	29.7	27.76	32.66
		2	24.34	21.25	27.7	21.98	27.99	25.57	25.55	26.24	28.66	26.32	29.28	27.52	30.96
		3	24.82	21.91	28.56	23.22	29.15	26.52	26.44	27.34	29.23	27.7	30.06	28.48	32.34
		4	23.97	20.64	27.23	21.98	27.59	25.26	25.26	26.17	28.48	26.92	29.29	27.46	32.77
		5	23.88	20.67	27.05	22.15	27.92	25.68	25.86	26.92	28.63	27.39	29.28	27.84	32.34
Stage 2	Early intra-membrane veliger (R)	1	23.83	20.57	26.97	20.97	26.96	24.45	24.27	24.4	26.08	25.87	28	25.75	31.2
		2	24.96	21.27	27.59	21.85	27.98	25.22	25.06	25.36	27.12	26.67	28.61	26.64	31.47
		3	24.97	21.49	27.76	21.38	27.45	25.06	24.75	25.74	26.91	26.61	29.26	26.98	32.94
		4	25.6	21.91	27.75	21.53	27.82	25.59	25.22	25.58	26.93	27.24	28.94	27.25	31.86
		5	25	21.69	27.49	21.84	27.95	25.2	25.09	25.62	26.87	27.36	29.34	26.68	31.63
	Mid intra-membrane veliger (S)	1	23.86	20.6	25.96	21.34	28.13	24.54	25.02	24.03	27.86	26.41	29.05	27.55	28.68
		2	24.13	21.35	26.44	21.77	28.18	25.25	24.83	24.55	28.05	26.39	30.09	28.68	29.8
		3	25.77	23.1	27.81	22.61	29.44	25.83	26.26	25.92	29.49	27.72	30.97	28.74	30.57
		4	23.4	20.64	25.74	20.92	27.12	24.01	24.42	23.76	27.07	25.67	28.03	26.46	28.83
		5	21.38	18.74	24.15	18.74	25.42	21.78	21.98	21.42	24.53	22.75	25.68	24.01	26.24
	Late intra-membrane veliger (T)	1	19.63	16.05	20.87	16.06	23.06	19.3	19.53	18.27	21.68	19.63	23.11	21.61	25.56
		2	18.81	15.91	20.65	14.71	22.61	18.8	18.85	17.63	21.02	19.62	22.79	21.45	24.72
		3	19.25	15.92	21.29	15.91	22.72	19.24	19.71	19.12	21.44	20.5	24.96	22.5	26.9
		4	19.74	16.22	21.09	16.61	23.89	20.21	20.36	19.39	22.71	21.95	24.66	23.2	27.29
		5	22.12	18.36	23.79	19.45	25.63	22.04	22.19	21.44	24.44	23.8	26.79	25.16	29.84
Stage 3	One-spiral whorl stage (C)	1	20.89	17.41	22.39	16.55	24.13	20.8	20.51	18.87	23.12	20.75	24.01	22.86	26.24
		2	21.42	17.5	22.43	16.36	24	19.82	19.92	18.97	23.23	21.64	24.4	23.31	26.1
		3	21.72	18.07	23.43	17.06	24.19	20.96	20.68	19.81	23.63	22.03	25.58	24.07	27.73
		4	23	17.92	22.94	17.31	24.85	21.43	20.98	18.61	22.88	22.39	24.96	24.32	26.34
		5	22.12	18.38	23.7	18.42	25.44	21.83	21.68	20.15	24.03	22.51	25.03	24.1	27.39
	Two-spiral whorl stage (D)	1	22.71	17.22	22.07	17.4	24.16	21.09	20.87	19.08	23.03	21.58	24.33	23.3	26.92
		2	21.99	18.12	23.29	18.14	24.78	22.07	21.12	19.66	23.7	22.48	25.41	24.37	27.67
		3	21.62	16.54	21.39	16.05	23.14	20.02	19.79	18.53	22.42	21.15	24.44	22.51	26.12
		4	21	16.76	22.44	16.89	23.6	20.36	20.34	19.12	23.04	21.71	24.27	23.38	26.51
		5	19.81	16.17	21.85	16.03	22.6	19.72	19.17	18.07	22.17	20.49	23.72	22.81	26.51
	Early three-spiral whorl stage (F)	1	21.75	15.89	21.04	16.34	23.5	19.78	19.79	18.57	22.23	20.97	23.51	21.91	25.46
		2	21.65	17.8	22.41	16.83	23.71	20.81	19.91	19.1	22.62	20.99	24.15	22.03	25.77
		3	20.62	16.96	21.28	16.79	23.64	20.88	20.43	19.64	23.04	21.29	24.32	23.33	26.2
		4	20.57	17.11	21.4	16.74	23.7	20.05	19.92	18.78	22.19	21.21	23.68	21.87	25.61
		5	20.6	16.98	21.34	16.18	23.1	19.85	19.84	18.53	22.46	20.96	23.49	22.26	25.56
Stage 4	Late three-spiral whorl stage (G)	1	20.81	16.73	22.15	17.41	24.64	21.13	20.96	19.81	23.31	22.06	25.09	24.25	27.32
		2	21.05	17.4	22.47	17.5	24.68	21.36	20.63	19.89	23.62	22.67	25.63	24.36	27.12
		3	20.8	16.83	21.94	17.65	24.75	21.01	21.07	20.06	23.47	23.32	25.71	24.73	27.25
		4	21.18	17.28	22.31	18.33	24.62	21.73	21.46	20.23	23.85	22.9	25.39	24.91	27.96
		5	21.81	17.69	22.57	18.18	24.82	21.77	21.53	20.33	23.78	22.8	25.56	25.02	27.96
	Four-spiral whorl stage (J)	1	20.62	15.96	21.85	17.25	24.48	21.07	20.96	19.79	23.27	22.58	24.72	23.93	27.55
		2	22.39	16.76	21.97	16.75	24.27	20.8	20.3	19.67	23.12	22.55	25.44	24.43	26.22
		3	20.83	16.6	21.91	17.61	24.21	20.92	21.34	20.15	23.83	23.08	25.71	24.66	27.35
		4	21.32	16.94	22.61	17.77	24.92	21.52	21.22	20.27	23.6	22.97	25.63	24.69	26.54
		5	22.39	18.27	23.97	18.52	25.46	21.07	21.21	20.65	23.35	22.65	25.84	24.67	27.26
Stage 5	Juvenile (Y)	1	20.41	17.27	20.76	17.27	23.74	20.73	20.73	22.44	23.26	22.43	24.02	23.49	26.52
		2	21.54	18.9	22.31	18.41	24.8	21.91	21.54	23.52	23.71	22.98	24.59	23.51	26.85
		3	19.43	16.87	20.5	16.68	23.21	20.28	20.66	22.44	23.01	21.68	23.53	22.63	25.68
		4	21.9	19.18	23.1	18.13	24.67	21.81	21.64	23.77	23.79	22.45	24.96	23.86	27.39
		5	19.76	16.79	20.84	16.97	22.88	20.6	20.52	22.72	22.84	20.86	24.01	23.02	26.08
Adult tissue
Adult	Gill	1	22.97	20.2	26.8	18.41	25.66	23.01	22.68	22.11	24.94	24.97	25.1	25.32	29.39
		2	21.08	19.72	25.41	17.62	25.04	22.82	22.24	23.53	24.53	23.69	25.97	25.19	29.47
		3	22.23	18.32	24.18	16.92	24.73	21.23	20.74	21.64	23.43	21.93	23.62	24.1	28.09
		4	20.53	18.56	24.74	16.69	23.93	20.94	20.91	24.86	23.98	21.75	23.61	23.58	27.9
		5	21.18	18.91	24.86	17.14	24.1	21.61	20.78	23.68	24.47	22.39	24.14	23.95	27.38
	Hemocyte	1	25.83	22.17	28.85	20.21	27.88	24.65	23.67	26.69	26.28	26.65	28.09	27.96	32.08
		2	24.33	23.63	30.67	22.46	30.23	26.44	25.38	26.18	24.68	24.83	27.56	25.62	29.04
		3	25.23	22.35	28.73	21.85	30.02	24.64	23.85	26.92	24.38	24.37	25.54	26.47	30.93
		4	21.7	21.79	28.47	20.55	28.06	23.8	23.13	25.89	23.92	21.86	23.99	24.46	28.15
		5	23.79	19.13	25.85	16.9	25.9	21.44	22.2	27.9	25.49	24.55	27.84	26.23	30.44
	Intestine	1	24.56	19.84	26.59	18.97	26.42	22.84	22.21	23.24	24.14	24.66	26.69	25.59	31.61
		2	29.84	27.26	33.86	25.34	31.94	30.57	28.72	29.73	31.12	31.61	33.62	31.46	33.74
		3	26.33	21.32	27.22	19.78	29.2	24.05	23.36	24.12	24.9	24.61	27.38	27.01	32.72
		4	24.75	21.63	27.89	19.72	27.42	24.14	23.84	23.39	25.94	23.82	28.02	26.97	32.21
		5	29.26	24.97	30.65	23.53	32.45	27.94	26.65	28.44	29.82	28.99	32.85	31.03	33.92
	Leiblein's gland	1	21.35	19.13	24.94	18.34	25.06	21.29	21.08	22.15	22.69	23.07	25.53	22.96	30.16
		2	26.48	24.56	29.68	23.98	31.28	26.81	26.27	26.01	27.52	27.78	30.55	27.85	33.9
		3	26.4	23.51	28.37	21.38	28.7	25.81	25.11	25.99	26.59	26.78	29.6	27.3	33.86
		4	25.66	23.02	29.19	21.85	29.08	25.06	24.68	25.5	27.58	25.88	28.9	29.08	32.79
		5	25.03	22.17	29	21.9	28.3	23.87	23.75	25.1	26.72	25.5	28.31	26.52	30.55
	Liver	1	25.84	21.26	27.38	19.94	28.02	23.75	22.88	26.33	25.09	25.43	27.92	26.97	31.03
		2	22.48	19.12	25.38	17.7	25.55	21.62	21.28	21.73	22.82	22.28	26.31	23.23	29.53
		3	24.21	19.35	25.96	16.85	24.96	21.94	21.17	22.54	23.05	22.39	24.67	23.14	30.31
		4	24.48	21.18	28.12	19.14	27.26	23.52	23.27	22.99	25.74	23.68	26.76	25.37	32.38
		5	23.93	20.85	27.55	19.23	26.92	23.3	22.07	23.53	25.42	23.71	27.6	25.21	29.63
	Kidney	1	23.65	19.13	24.93	17.97	26.3	22.4	21.71	23.73	23.6	23.44	25.2	23.97	28.39
		2	26.47	22.74	28.51	21.52	29.13	25.94	25.93	27.8	27.76	27.54	30.77	27.18	33.01
		3	23.92	19.54	24.94	17.59	26.21	22.58	22.11	25.18	24.17	23.27	24.72	24.6	29.66
		4	23.75	20.45	26.57	18.08	26.82	23.7	23.49	25.73	25.95	23.17	26.85	24.96	31.22
		5	25.81	21.77	27.85	20.32	28.55	24.85	23.88	27.95	26.99	25.43	28.39	25.87	30.1
	Mantle	1	20.24	16.94	21.56	15.52	22.49	18.83	18.82	26.72	20.64	20.66	21.61	22.06	25.16
		2	21.72	19.2	21.52	17	26.11	20.88	20.64	30.46	22.29	21.53	25.58	24.17	29.88
		3	21.02	17.04	20.5	15.41	23.79	18.46	18.66	28.5	19.63	19.1	21.22	21.36	25.97
		4	18.13	15.79	19.33	14.24	22.13	17.54	17.63	26.53	20.2	18.65	20.87	19.96	25.62
		5	19.42	15.93	19.95	14.61	22.52	17.97	17.39	27.77	20.19	19.1	21.16	20.78	23.56
	Gonad	1	25.85	22.18	28.75	21.92	28.13	24.65	24.04	24.95	25.53	25.66	28.45	26.27	32.45
		2	27.82	21.44	26.74	20.65	26.96	23.25	22.97	32.73	28.73	27.63	32.29	30.31	32.45
		3	28.7	21.08	26.25	20.93	27.29	23	22.74	30.69	26.64	27.06	29.25	28.09	34.08
		4	25.91	19.39	25.39	17.83	25.26	21.29	20.92	28.34	26.85	24.59	28.5	27.27	33.1
		5	23.91	21.38	26.89	20.27	27.04	23.04	20.9	30.68	23.75	22.17	24.86	23	28.62
